# Supplementary material for: A novel polymeric micelle used for in vivo MR imaging tracking of neural stem cells in acute ischemic stroke
Source: Royal Society of Chemistry journal article supplement (doi:10.1039/c7ra00345e), 2017-01-01
Supplement: c7ra00345e1.pdf [file c7ra00345e1.pdf]

**Electronic Supplementary Information (ESI)**

**A novel polymeric micelle used for in vivo MR imaging tracking of neural stem cells in acute ischemic stroke**

*Liejing Lu<sup>a</sup>, MD; Yong Wang<sup>b,1</sup>, PhD; Minghui Cao<sup>a</sup>, MD; Meiwei Chen<sup>a</sup>, MM; Bingling Lin<sup>a</sup>, MD; Xiaohui Duan<sup>a,1</sup>, MD; Fang Zhang<sup>a</sup>, MD; Jiaji Mao<sup>a</sup>, MD; Xintao Shuai<sup>b,c</sup>, PhD; Jun Shen<sup>a\*</sup>, MD*

a Department of Radiology, Sun Yat-Sen Memorial Hospital, Sun Yat-Sen University, Guangzhou 510120, Guangdong, China

b PCFM Lab of Ministry of Education, School of Materials Science and Engineering, Sun Yat-Sen University, Guangzhou 510275, China

c BME Center, Zhongshan School of Medicine, Sun Yat-Sen University, Guangzhou 510080, China

1: These authors contribute equally to this work.

\* **Corresponding Author:** Jun Shen

Department of Radiology, Sun Yat-Sen Memorial Hospital

Sun Yat-Sen University

No.107 Yanjiang Rd. West, Guangzhou 510120

China

Telephone: +86 20 8133 2702 Fax: +86 20 8133 2702

E-mail: [shenjun@mail.sysu.edu.cn](mailto:shenjun@mail.sysu.edu.cn)

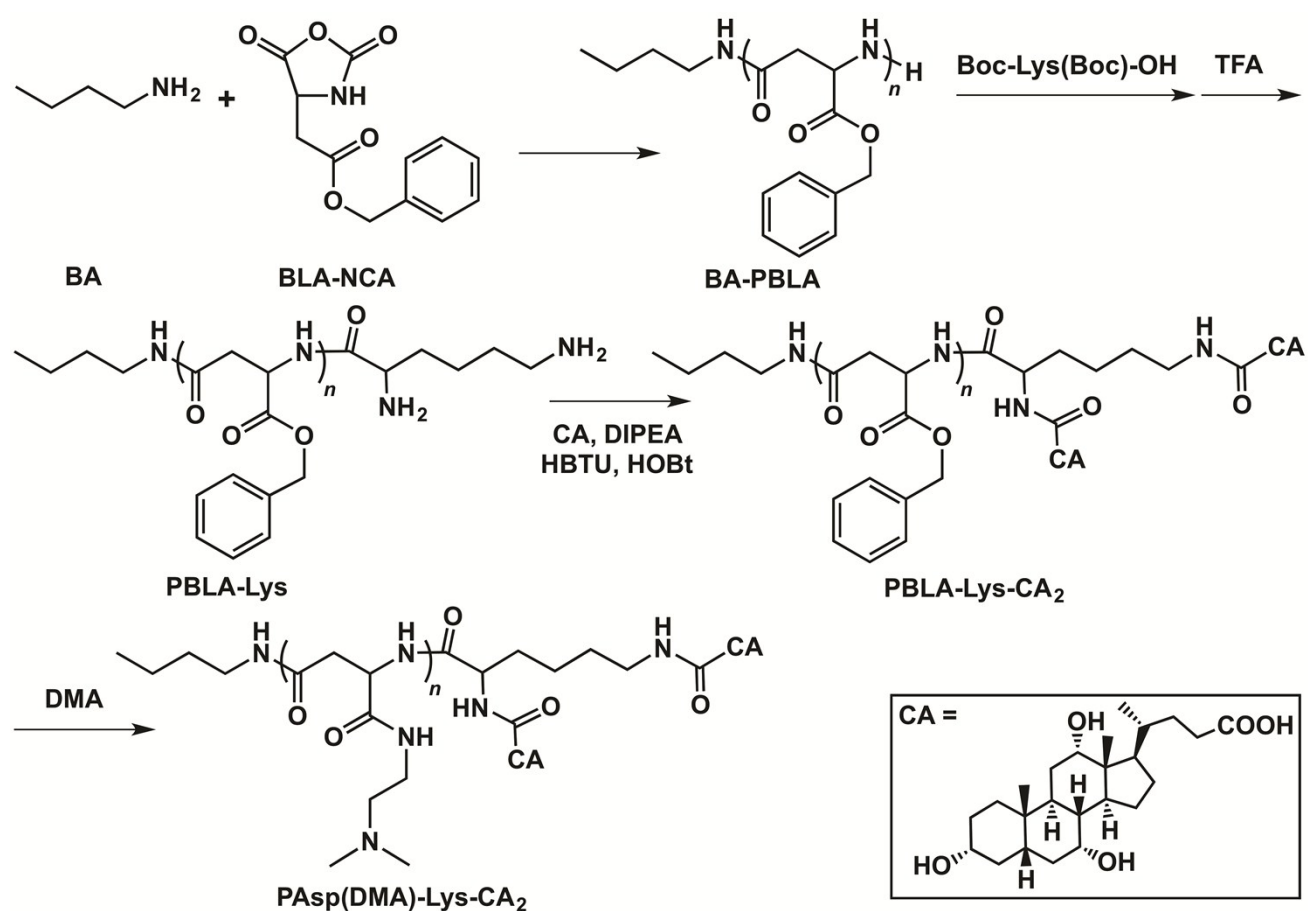

Supplementary Figure 1. Schematic diagram of synthesis of PAsp(DMA)-Lys-CA<sub>2</sub> copolymer.

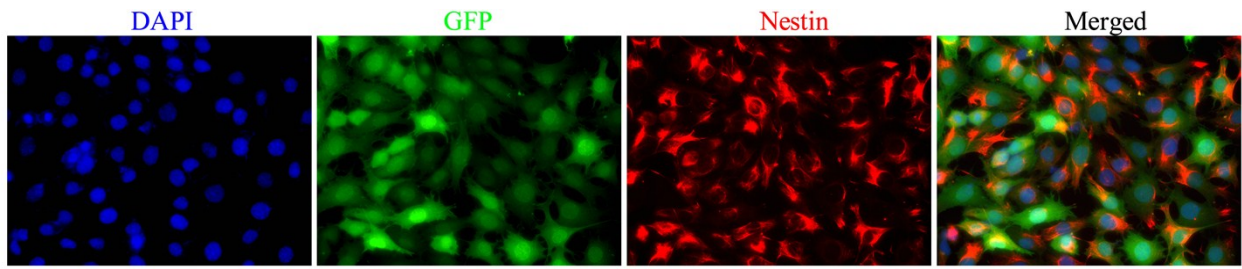

**Supplementary Figure 2. The identification of C17.2 NSCs.**

Immunofluorescence staining micrographs show that the cells are positive for GFP and nestin.

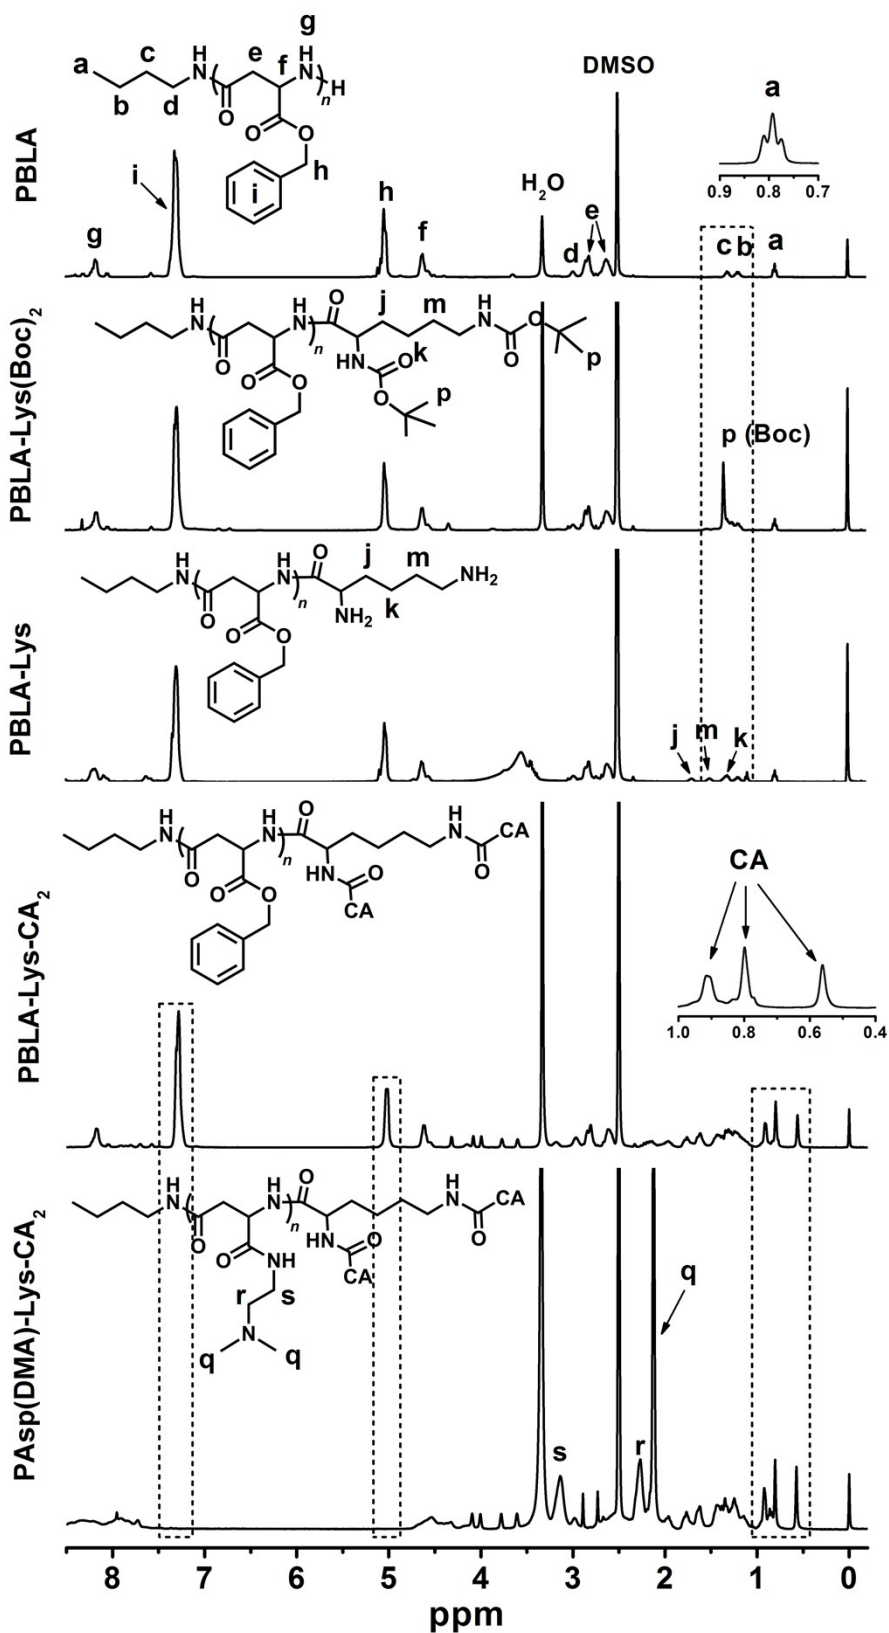

Supplementary Figure 3.  $^1\text{H}$  NMR spectrum of PBLA, PBLA-Lys(Boc) $_2$ , PBLA-Lys, PBLA-Lys-CA $_2$  and PAsp(DMA)-Lys-CA $_2$  in  $\text{DMSO-}d_6$ . The major resonance peaks of the copolymer in

the  $^1\text{H}$  spectrum well fit into the expected chemical structure: 0.75-0.85 ppm (t,  $-\text{CH}_2\text{CH}_3$  of BA, a), 1.14-1.37 ppm (t,  $-\text{CH}_2\text{CH}_2\text{CH}_3$  of BA, b and c), 2.98 ppm (m,  $-\text{CH}_2\text{CON}-$ , d), 2.54-2.90 ppm (m,  $-\text{CHCH}_2\text{CON}-$  of PBLA, e), 4.50-4.66 ppm (m,  $-\text{CHCH}_2\text{CON}-$  of PBLA, f), 8.11-8.23 ppm (m,  $-\text{CHCH}_2\text{CONH}-$  of PBLA, g), 4.96-5.14 ppm (m,  $-\text{CH}_2\text{C}_6\text{H}_5$  of PBLA, h), 7.22-7.42 ppm (m,  $-\text{CH}_2\text{C}_6\text{H}_5$  of PBLA, i), 1.27-1.70 ppm (m,  $-\text{CH}_2-$  of Lys, j, m and k), 2.29 ppm, 3.14 ppm (m,  $-\text{CH}_2-$  of DMA, r and s), 2.12 ppm (m,  $-\text{CH}_3-$  of DMA, q).

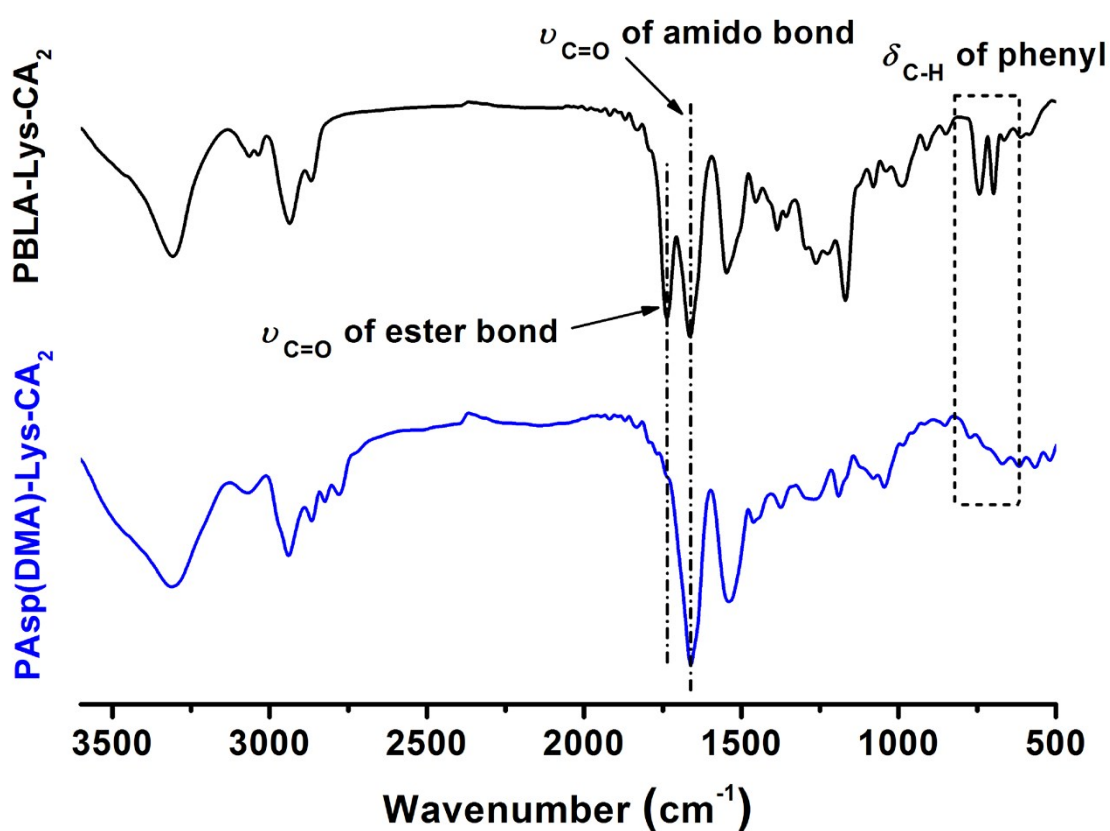

Supplementary Figure 4. FTIR spectra of PBLA-Lys-CA<sub>2</sub> and PAsp(DMA)-Lys-CA<sub>2</sub>.

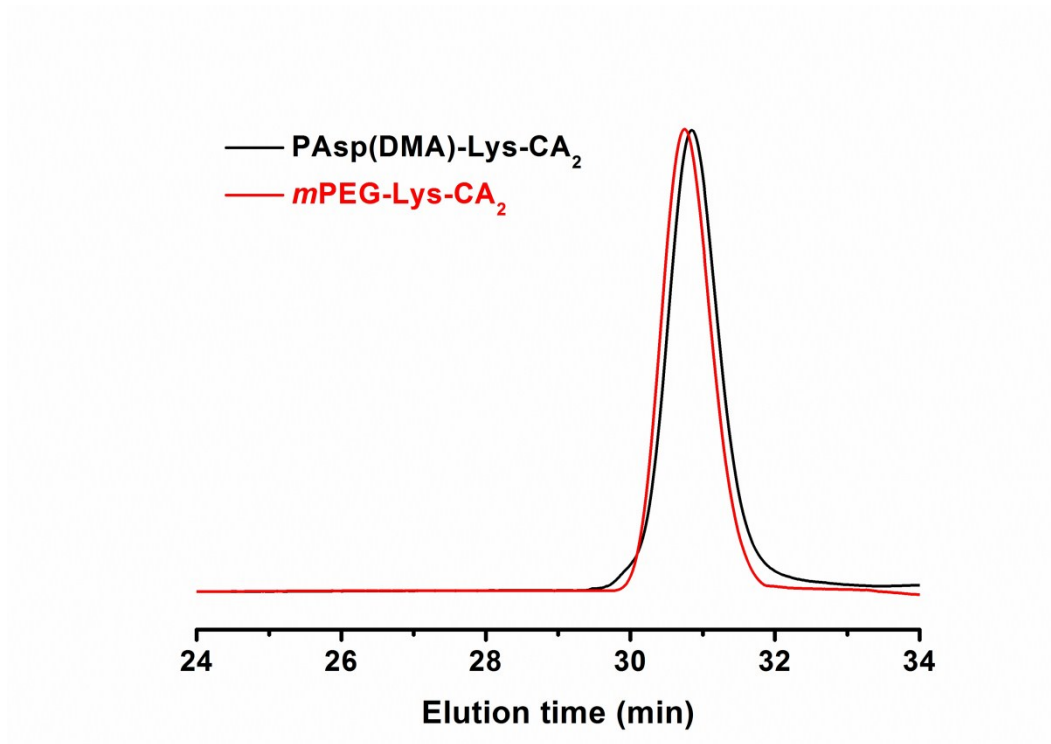

**Supplementary Figure 5. GPC curves of PAsp(DMA)-Lys-CA<sub>2</sub> and *m*PEG-Lys-CA<sub>2</sub> in THF at a flow rate of 1 mL/min.**

**Supplementary Table 1. The molecular weight and polydispersity of polymers.**

| Polymer                          | $M_n^a$ | $M_n^b$ | $M_w/M_n^b$ |
|----------------------------------|---------|---------|-------------|
| PAsp(DMA)-Lys-CA <sub>2</sub>    | 2610    | 2780    | 1.16        |
| <i>m</i> PEG-Lys-CA <sub>2</sub> | 2730    | 2900    | 1.09        |

<sup>a</sup>calculated by <sup>1</sup>H NMR; <sup>b</sup>detected by GPC.

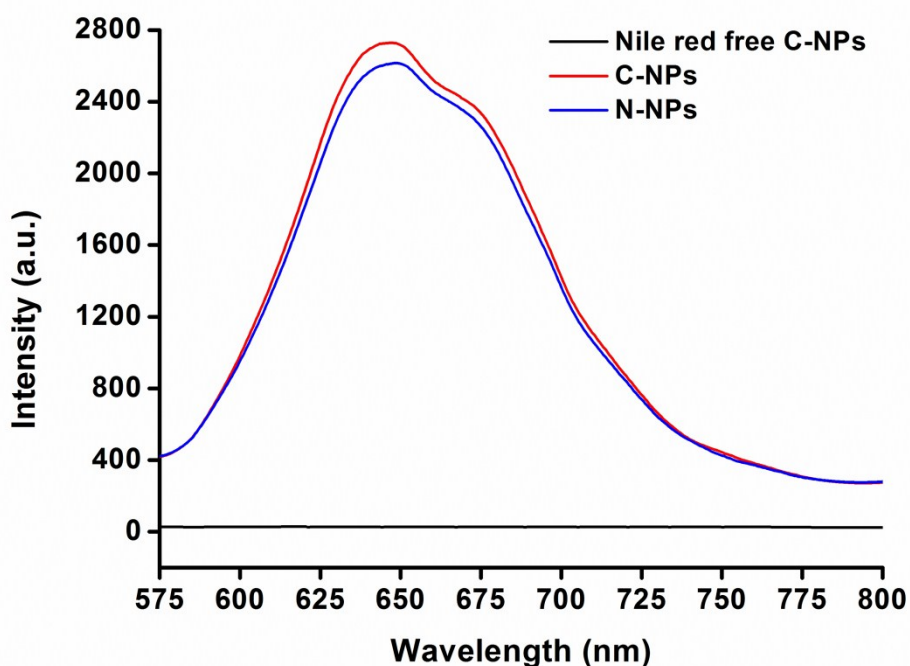

**Supplementary Figure 6. Fluorescence spectroscopy of different nanoparticles.** The emission fluorescence profiles show the presence of the Nile red in SPIONs and Nile red co-loaded cationic nanoparticles (C-NPs) and neutral nanoparticles (N-NPs) compared with Nile red free, SPIONs loaded cationic nanoparticles (Nile red free C-NPs). Micelle concentration: 0.5 mg/mL; excitation wavelength: 550 nm; slit width: 10 nm; scanning speed: 500 nm/min.

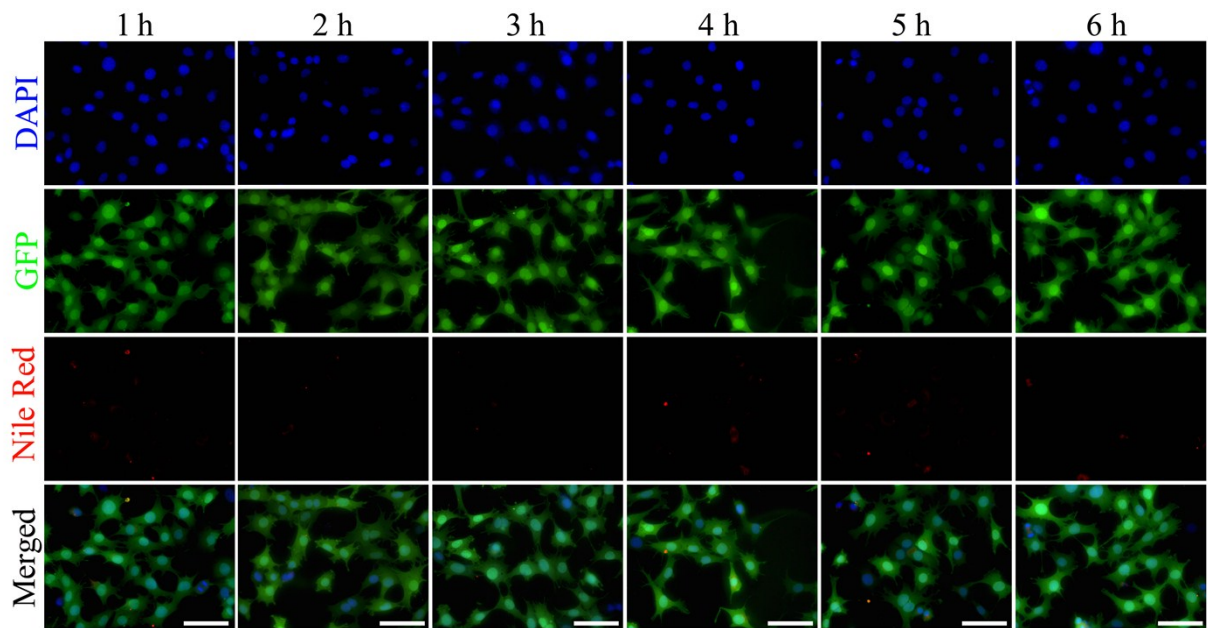

**Supplementary Figure 7. The dynamics of cellular uptake of neutral polymeric micelles.** Fluorescence micrographs show few red particles (nile red) accumulated in the membrane and cytoplasm of GFP-C17.2 NSCs labeled with neutral PEG-Lys-CA2 (N-NPs) during the whole labeling process. Scale bar = 50  $\mu\text{m}$ .

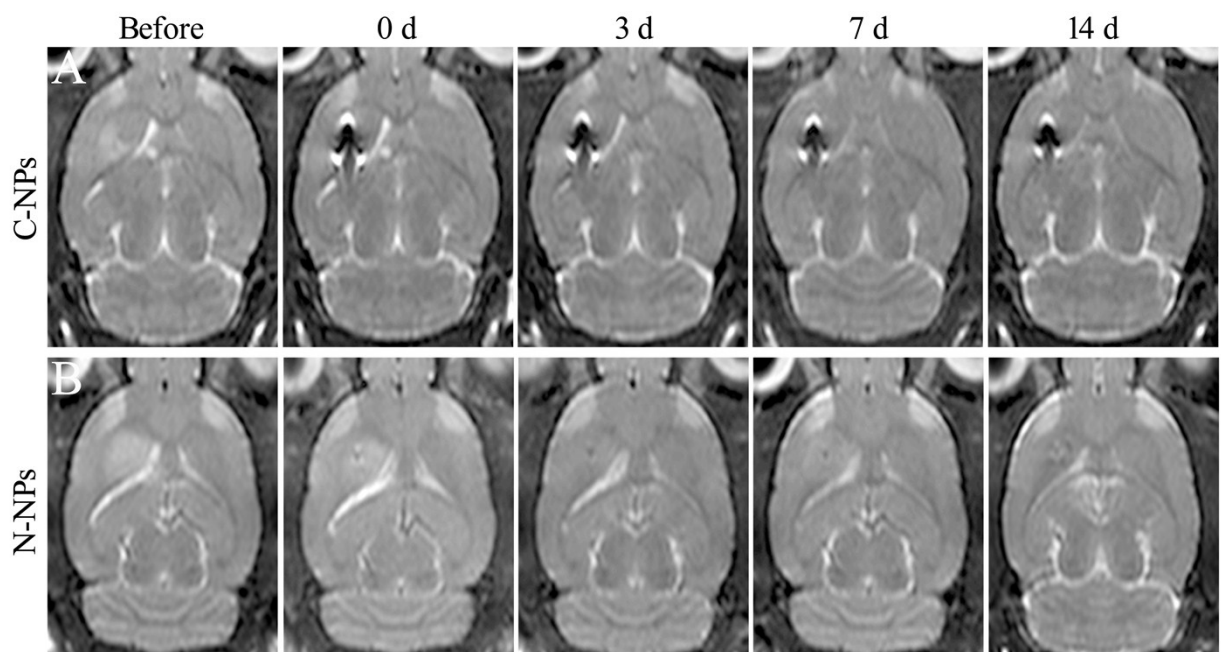



**Supplementary Figure 8. In vivo MRI tracking of grafted, labeled NSCs.** (A) T2-weighted MR images show the less pronounced hypointense signal of labeled GFP-C17.2 NSCs with cationic PAsp(DMA)-Lys-CA<sub>2</sub> (C-NPs) in the striatum ipsilateral to the infarcted hemisphere. (B) T2-weighted MR images only show a very thin, “black” needle track in the striatum of an animal treated with cells pre-labeled with neutral PEG-Lys-CA<sub>2</sub> (N-NPs).
